# Supplementary material for: Hypovitaminosis D in Postherpetic Neuralgia—High Prevalence and Inverse Association with Pain: A Retrospective Study
Source: MDPI journal article supplement (doi:10.3390/nu11112787), 2019-11-15
Supplement: s1 [file s1]

**Supplementary S1. First-visit questionnaire to the pain clinic at Chi Mei Medical Center**

First visit date: (dd/mm/yy)

Name: ; Medical record number: ; Birthday:

(1) Basic information:

Diet: vegetarian: No/Yes, (1. breakfast only; 2. two days a month; 3. always)

Smoking: No/Yes, years; package/day; quitted for years

Drinking: No/Yes, year; (Frequency: every day, days a week; bottles/time; totally mL;  
Beer/sorghum/Whiskey/ )

Betel nut: No/Yes, for years; pack/day; quitted for years

(2) Past medical history:

Hypertension: No/Yes, for years (Medication: ) BP: HR:

Coronary heart disease: No/Yes, for years (Medication: ; stenting: years ago)

Stroke: No/Yes ( times, years ago)

Diabetes: No/Yes, for years (Medication: /RI year).

Cancer: No/Yes. ( year ago)- left/right (breast/lung/kidney) / pancreas / colon /

Treatment: Surgery/Chemotherapy/Radiotherapy/Others:

Autoimmune diseases (SLE, RA, Sjogren syndrome, ): No/Yes, for years

Hepatitis B/C carrier; liver cirrhosis: No/Yes;

Chronic kidney disease, hemodialysis/PD: No/Yes, for years (weekdays 1,3,5/2,4,6)

Peptic ulcers: No/Yes, for years (post treatment- years ago)

*Helicobacter pylori*: No/Yes, for years

Other diseases: COPD: No/Yes.; Hyperuricemia: No/Yes.; Glucose-6-phosphate dehydrogenase (G6PD) deficiency: No/Yes.;

Surgery history (site / time / hospital):

Special medications: steroid, drug abuse,

Drug allergy: No/Yes, (Drug: ; Symptoms: rash / /shock)

Supplementation : No/Yes, Regular/Irregular (multivitamins ; calcium mg/day; vitamin C mg/day; vitamin D iu/day; fish oil mg/day)

(3) Family history

Father: Diabetes / Hypertension / Stroke / Tumor

Mother: Diabetes / Hypertension / Stroke / Tumor;

(4) History of herpes zoster

Sites: face/neck and shoulder/upper extremity/trunk/sacral/lower extremity

Nerve roots: left/right; C/T/L/S \_\_\_\_\_

Date of shingles outbreak: \_\_\_\_\_

Duration (from the zoster onset to the first visit at our pain clinic): \_\_\_\_\_ weeks/months

Referral to our pain clinic: due to (A); (B); (C) both \_\_\_\_\_

(A) Poor response to treatment

(B) Intolerable side effects (dizziness / nausea and vomiting / constipation / hand and foot swelling / )

Have you taken antiviral drugs? No/Yes, for days. /Don't know.

Have you taken lyrica /neurontin / morphine? No/Yes, dosage:

Have you received nerve blocks ( )?

(5) DN4 Questionnaire - \_\_\_\_ /10

QUESTION 1:

Does the pain have one or more of the following characteristics? YES NO

(5-1) Burning ..... ☐ ☐

(5-2) Painful cold ..... ☐ ☐

(5-3) Electric shocks ..... ☐ ☐

QUESTION 2:

Is the pain associated with one or more of the following symptoms in the same area?

YES NO

(5-4) Tingling ..... ☐ ☐

(5-5) Pins and needles ..... ☐ ☐

(5-6) Numbness ..... ☐ ☐

(5-7) Itching ..... ☐ ☐

QUESTION 3:

Is the pain located in an area where the physical examination may reveal one or more of the following characteristics?

YES NO

(5-8) Hypoesthesia to touch ..... ☐ ☐

(5-9) Hypoesthesia to pinprick ..... ☐ ☐

QUESTION 4:

(5-10) In pain area, can the pain be caused or increased by Brushing? YES NO

..... ☐ ☐

(6-1) NRS scales (0-10) of average spontaneous pain:

(6-2) NRS scales (0-10) of the worst spontaneous pain:

(6-3) NRS scales (0-10) of brush-evoked pain:

YES NO

(7) Other characteristics of pain: spasticity ☐ ☐

swelling pain ☐ ☐

aching pain ☐ ☐

dull pain ☐ ☐

sharp pain ☐ ☐

more pain when the weather temperature increased

more pain when the weather temperature dropped
